# Supplementary material for: Widespread energy limitation to life in global subseafloor sediments
Source: PubMed Central journal article supplement (PMC7406382; doi:10.1126/sciadv.aba0697), 2020-08-05
Supplement: aba0697_SM.pdf [file aba0697_SM.pdf]

## Supplementary Materials for

### **Widespread energy limitation to life in global seafloor sediments**

J. A. Bradley\*, S. Arndt, J. P. Amend, E. Burwicz, A. W. Dale, M. Egger, D. E. LaRowe

\*Corresponding author. Email: [jbradley.earth@gmail.com](mailto:jbradley.earth@gmail.com)

Published 5 August 2020, *Sci. Adv.* **6**, eaba0697 (2020)

DOI: [10.1126/sciadv.aba0697](https://doi.org/10.1126/sciadv.aba0697)

#### **This PDF file includes:**

Supplementary Text  
Figs. S1 to S5  
Tables S1 to S4  
References

## **Supplementary Text**

### Partitioning of the ocean floor

We partition the ocean floor into shelf, margin and abyss domains (Fig. S5). The locations of the continental margin boundaries are adopted from ref. (71): shelf environments roughly correspond to water depths <200m, with the exception of the Antarctic region where shelf area corresponds to water depths <500m; areas deeper than ~3500m are taken to be abyssal plain; ocean floor covered by 500–3500m water are referred to as margins. Accordingly, continental shelf underlies about 6.3% of ocean surface area, margins make up 10.8% and the abyssal domain constitutes the remaining 82.9%.

### Power produced by global marine sediment microbes

In order to calculate the total power produced in the (i) oxic, (ii) sulfate-reducing and (iii) methanogenic sedimentary layers, first we compute the total integrated rate of POC degradation between (i) the SWI and the O<sub>2</sub>-penetration depth, (ii) the O<sub>2</sub>-penetration depth and the sulfate-methane transition depth, and (iii) the sulfate-methane transition depth and the maximum depth of quaternary sediments. This is then multiplied by the Gibbs energy of each catabolic reaction (Table S2). Total power produced by microorganisms in Quaternary age marine sediment is 37.3 GW. Large uncertainties associated with the POC burial flux prior to 2.59 million years ago obscures efforts to model degradation rates in pre-Quaternary sediments. Thus, the overall contribution of power from microbially mediated POC globally remains unknown. However, Quaternary sediments include the most microbially active portions of marine sediments, producing orders of magnitude higher power than sediments older than 2.59 million years. Thus, it is expected that sediments deposited before the Pleistocene produce negligible amounts of power (Fig. S2) compared to Pleistocene-age sediments, and thus our value stands as a first-order estimate for the total power of all marine-sediment hosted life. Assuming the total power captured by photosynthesis is 100 TW

(22), and that net primary productivity in the ocean accounts for 46.2% of global total (23), marine sediment microorganisms utilize the equivalent of ~0.08% of all photosynthetically produced power in the marine photic zone.

### Uncertainty

We use a combination of modelling approaches to derive estimates of cell-specific energy turnover on a global scale. Under nominal conditions and assumptions, we find that microorganisms subsist at a median of  $3.3 \times 10^{-20}$  W cell<sup>-1</sup>, and 84.0% of microorganisms subsist at an energy flux less than  $1.9 \times 10^{-19}$  W cell<sup>-1</sup>. Uncertainties in our calculations arise from a number of factors that are addressed here. Calculated cell-specific power production depends on (i) the rate of POC degradation, (ii) the Gibbs energy of the reaction, and (iii) the number of cells carrying out the reaction. Uncertainty in each of these factors, tested individually, results in a range in median power per cell from  $1.42 \times 10^{-20}$  W to  $6.82 \times 10^{-20}$  W. The percentage of microorganisms subsisting at a power below  $1.9 \times 10^{-19}$  W cell<sup>-1</sup> is at least 70.4% in all simulations. In addition, we have quantified the possible propagation of uncertainty through each component of our model. We find when accounting for the propagation of uncertainty (i-iii) under the most cautious/prudent assumptions (i.e. the combination of parameters that provide the highest deviation from nominal results), median per cell power is  $1.42 \times 10^{-20}$  to  $10.20 \times 10^{-20}$  W. Considering uncertainty in all factors, our main conclusions are supported, given the extraordinarily low per-cell powers, as well as relatively minor deviation from nominal results. The specific factors (i-iii) and analyses are outlined below.

#### (i) POC degradation rate.

In order to address the uncertainty associated with modelled POC degradation rates, we evaluate a range of simulations encapsulating all possible variability in the reactivity of POC deposited onto the seafloor and its evolution during burial. These phenomena are accounted for within the RCM by two parameters:  $a$  representing the average lifetime of reactive components of the POC, and  $\nu$ , a dimensionless parameter determining the shape of the distribution of reactivities. These adjustable parameters completely determine the shape of the initial distribution of POC reactivity. High  $\nu$  and low  $a$  values indicate a mixture of POC dominated by compounds that are typically degraded rapidly. Low  $\nu$  and high  $a$  values indicate a larger fraction of less reactive compounds that degrade slowly. See ref. (29) for a more in-depth description of these parameters. We prescribe POC reactivity for each domain, constrained based on a global parameter compilation, and observations that the  $\nu$  parameter values do not vary much between sites, while the  $a$  parameter can vary over orders of magnitude (e.g. refs. (29,41)). Therefore, we designate a constant  $\nu$  parameter of 0.125, characteristic of fresh organic matter (29) for all three domains. The values of  $a$  are determined by sedimentation rates based on a global compilation (29):

$$a = 10^{(3.35 - 14.81 \cdot \omega)} \quad (33)$$

where  $\omega$  represents the sedimentation rate (cm yr<sup>-1</sup>). This approach accounts for order-of-magnitude changes in  $a$  due to factors that control organic matter transit times from its source to deposition. These parameters thus reflect typically observed RCM parameter variability across various depositional environments. Despite our approach relying on a well-established model with hundreds of existing applications that are validated using a large body of existing interdisciplinary data, the availability of more coordinated data from a range of contrasting environments will serve to advance our predictive capabilities further in the future.

We also run simulations using parameter values spanning nearly the entire range of observed values reported in the literature (e.g. refs. (29,41)) (Table S3). After evaluating all possible variability in the reactivity of POC deposited onto the seafloor and its evolution during burial, the median power per cell ranges from  $1.42 \times 10^{-20}$  W (high reactivity scenario) to  $4.02 \times 10^{-20}$  W (low reactivity scenario). The percentage of microbes subsisting at powers  $< 1.9 \times 10^{-19}$  W cell<sup>-1</sup> is 77.5% (under a high reactivity scenario) and 84.6% (under a low reactivity scenario), representing a deviation from nominal simulation results by 0.6% to -6.5%. The values of  $a$  used in our uncertainty analyses extend well past what would be calculated based on the sedimentation-rate relationship (Eq. 33). The large parameter range that is tested has only a minor bearing on per cell energy fluxes.

(ii) Gibbs energy of the reaction.

In order to address the uncertainty associated with variability in Gibbs energy arising from spatial heterogeneities in the concentrations of reactants and products, we run additional simulations where the concentrations of the reactants and products are varied over realistic ranges to represent high energy and low energy scenarios (Table S3). The uncertainty in the Gibbs energies of each reaction does not meaningfully affect our results, considering microbial power production spans a range of five orders of magnitude, and the deviation of Gibbs energies from our nominal values is  $< 20\%$  and in many cases  $< 1\%$ . Accounting for the widest range of uncertainty in Gibbs energy, the median power per cell spans a range from  $2.61 \times 10^{-20}$  W (low energy scenario) to  $4.26 \times 10^{-20}$  W (high energy scenario). The percentage of microbes subsisting at powers  $< 1.9 \times 10^{-19}$  W cell<sup>-1</sup> is 81.7% to 87.2%, or a deviation from nominal simulation results by only 3.2% to -2.4%. Therefore, the reflected range in possible Gibbs energies and power do not meaningfully affect our results.

(iii) Number of cells carrying out the reaction.

We use the best available spatially-resolved global model for subseafloor biomass distribution ( $I$ ) to estimate cell abundance and thus calculate per-cell rates. We designate POC degraded in oxic sediments to be mediated by O<sub>2</sub>, POC degraded in sulfate-reducing sediments (deeper than the maximum O<sub>2</sub> penetration depth but shallower than the sulfate-methane transition) to be mediated by SO<sub>4</sub><sup>2-</sup>, and prescribe POC degraded beneath the sulfate-methane transition to methanogenesis (Table S2). Thus, the reaction network is simplified to account for the most pertinent biogeochemical process (53) and the major catabolic pathways of POC oxidation (54). Cell-specific catabolic rates are calculated by dividing total power by total cell numbers, thus assuming that all cells are equally performing the catabolic metabolism associated with that particular sedimentary zone (i.e. aerobic heterotrophy in the oxic zone, sulfate reduction in the sulfate-reducing zone, methanogenesis in the methanogenic zone, as in Table S2).

A large body of evidence suggests that the vast majority of microorganisms in subsurface sediments are involved in the degradation of organic matter (and overwhelmingly hold the genetic potential to degrade organic molecules), especially in organic-rich, coastal and/or anoxic settings (4,26,72-80). Oxic sediments are known to contain microbial communities consisting of strictly aerobic and facultative anaerobic heterotrophs, whilst anoxic sediments are enriched with strictly anaerobic groups, such as sulfate-reducing bacteria, anaerobic members of the Chloroflexi phylum, and methanogenic and methanotrophic archaea (78). We designate that POC degradation in the methanogenic sediment layers is carried out by acetoclastic methanogenesis, whilst noting that hydrogenotrophic methanogenesis has been shown to occur deep in the seafloor (12). Beulig et al. (26) have recently shown that hydrogenotrophic methanogens are ultimately fueled by acetate: acetate is converted to CO<sub>2</sub>



and H<sub>2</sub>, which is then used by methanogens, and thus, our assumptions serve the present study well. Besides the major POC degradation pathways used here (aerobic heterotrophy, sulfate reduction, and methanogenesis), denitrification, metal oxide reduction, weathering reactions, seismic processes, radioactive decay, and secondary redox reactions associated with POC degradation may all directly or indirectly (i.e. produce reactants that when utilized by microorganisms) supply energy (28). Energy may also be provided by fermentation, although its importance is not well known. Although POC oxidation is the primary energy supply to microorganisms, we run additional simulations where we assume that only 50% to 95% of the microbial community are responsible for and therefore gaining energy from POC degradation (81-83). Accurate determination of the proportion of organisms that are heterotrophic in a marine sediment sample is plagued with various problems including difficulty to assign function based on genomic reads, variability among and between genomic datasets, the varying number of marker genes for heterotrophy relative to carbon fixation (within single cells and among different organisms), the number of pathways involved in organic matter degradation in sediments, and the difficulty associated with normalization to single copy marker genes (84-89). Moreover, many of the phylogenetic groups found in sediments are candidate phyla that are not yet cultivated or closely related to a pure culture (12,55,79,90). These factors make determination of metabolic function challenging even for a single sample of marine sediment – let alone doing this on a global basis. For these reasons, we are cautious about suggesting precise values for the proportion of the microbial community are responsible for and therefore gaining energy from POC degradation on a global scale. Instead, we evaluate a wide range of uncertainty in the proportion of organisms assumed to be utilizing organic carbon for energy (95% to 50%). Based on widely-accepted views of marine sediment biogeochemistry and the data provided above, we are confident that our analysis of uncertainty spans a sufficiently wide range. Moreover, selecting a lower-bound global estimate of 50% has an additional advantage of clearly demonstrating the consequence of halving the number of cells being considered in our model. After evaluating possible variability in the proportion of heterotrophic microorganisms in subseafloor sediments, the median power per cell is  $3.49 \times 10^{-20}$  W (95% heterotrophs) to  $6.64 \times 10^{-20}$  W (50% heterotrophs). Furthermore, the percentage of microbes subsisting at powers  $< 1.9 \times 10^{-19}$  W cell<sup>-1</sup> is 70.4% (assuming 50% heterotrophs) to 83.3% (assuming 95% heterotrophs), representing a maximum deviation from nominal simulation results by -13.6%. It is noteworthy that implementing this extreme end-member limit causes only a minor difference in our results, and nevertheless supports our conclusion that energy limitation to microbial life is extremely widespread in marine sediments. Moreover, if we have underestimated the number of cells contained in marine sediment (based on ref. (1)), per cell power utilization will be even lower – thereby strengthening our overall conclusion of widespread energy limitation to life in marine sediments.

We also run additional simulations to evaluate how changes in the geographic location and depth of occurrence of each metabolic zone (i.e. oxygen penetration depth, sulfate-methane transition depth) affect our results. With 10% variation in the depth of oxic, sulfate-reducing, and methanogenic sediments, the impact on the median per cell power utilization is trivial: a change from  $3.41 \times 10^{-20}$  W to  $3.42 \times 10^{-20}$ .

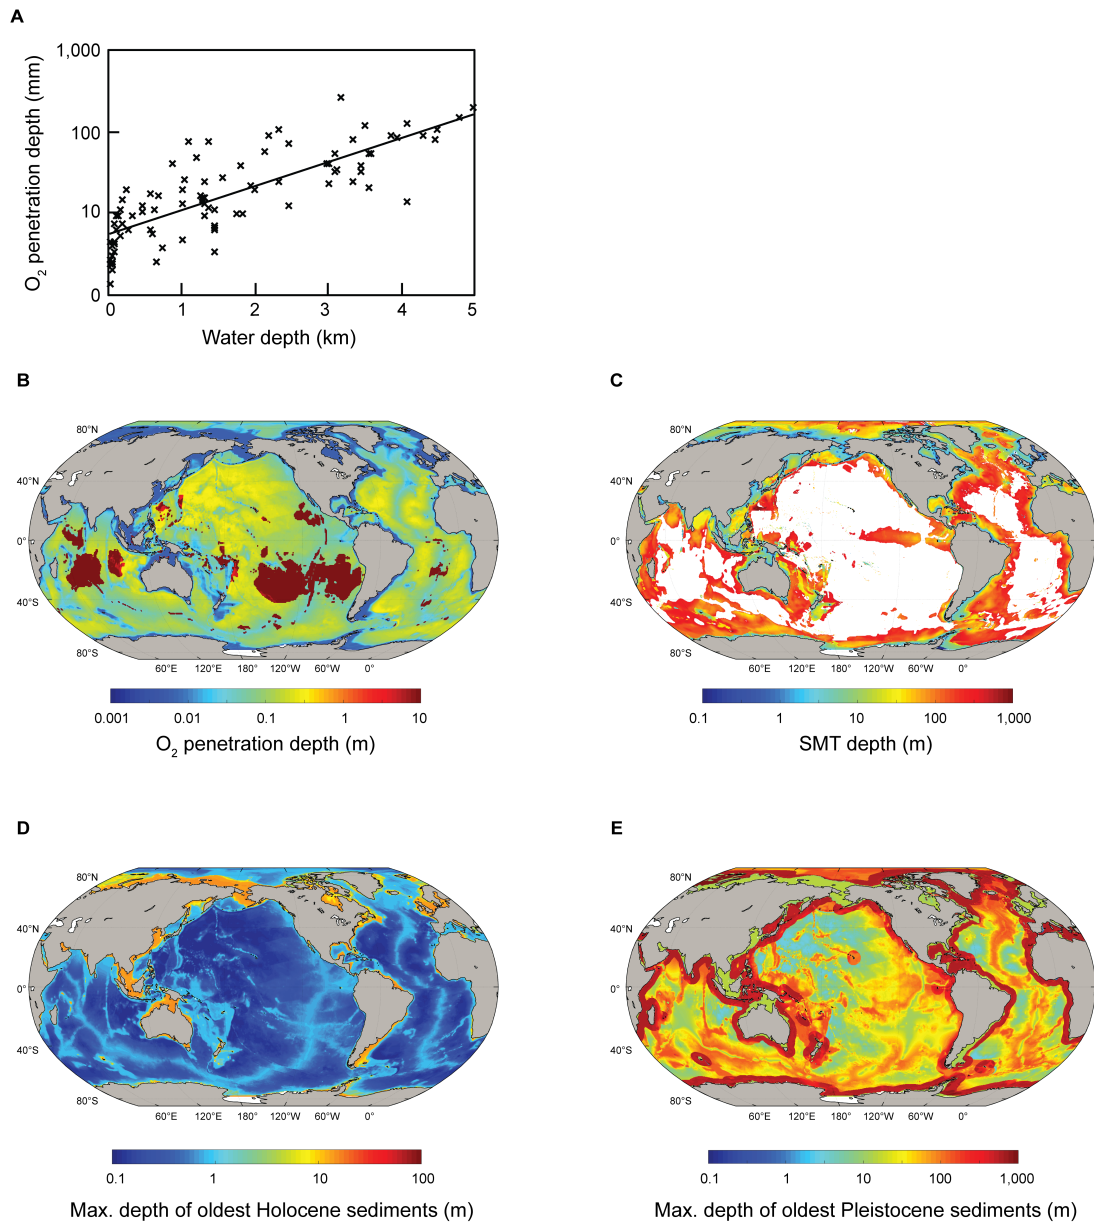

**Fig S1. Oxygen penetration, sulfate-methane transition, and extent of Holocene and Pleistocene-aged sediments.** (A) Regression model relating measured O<sub>2</sub> penetration depth in global sediments (y) to water depth (x):  $y = 5.5673 \times e^{0.6769x}$  ( $R^2=0.63$ ). Supporting data and references are provided in Table S4. These data were compiled by Ronnie Glud (University of Southern Denmark) and Frank Wenzhöfer (Alfred Wegener Institute, Bremerhaven). (B) Modelled oxygen penetration depth (m) in global sediments. (C) Sulfate-methane transition depth (m) in global sediments. White areas denote regions of the seafloor where there is no sulfate-methane transition. (D) Maximum depth (m) of the oldest Holocene-aged and (E) Pleistocene-aged sediments.

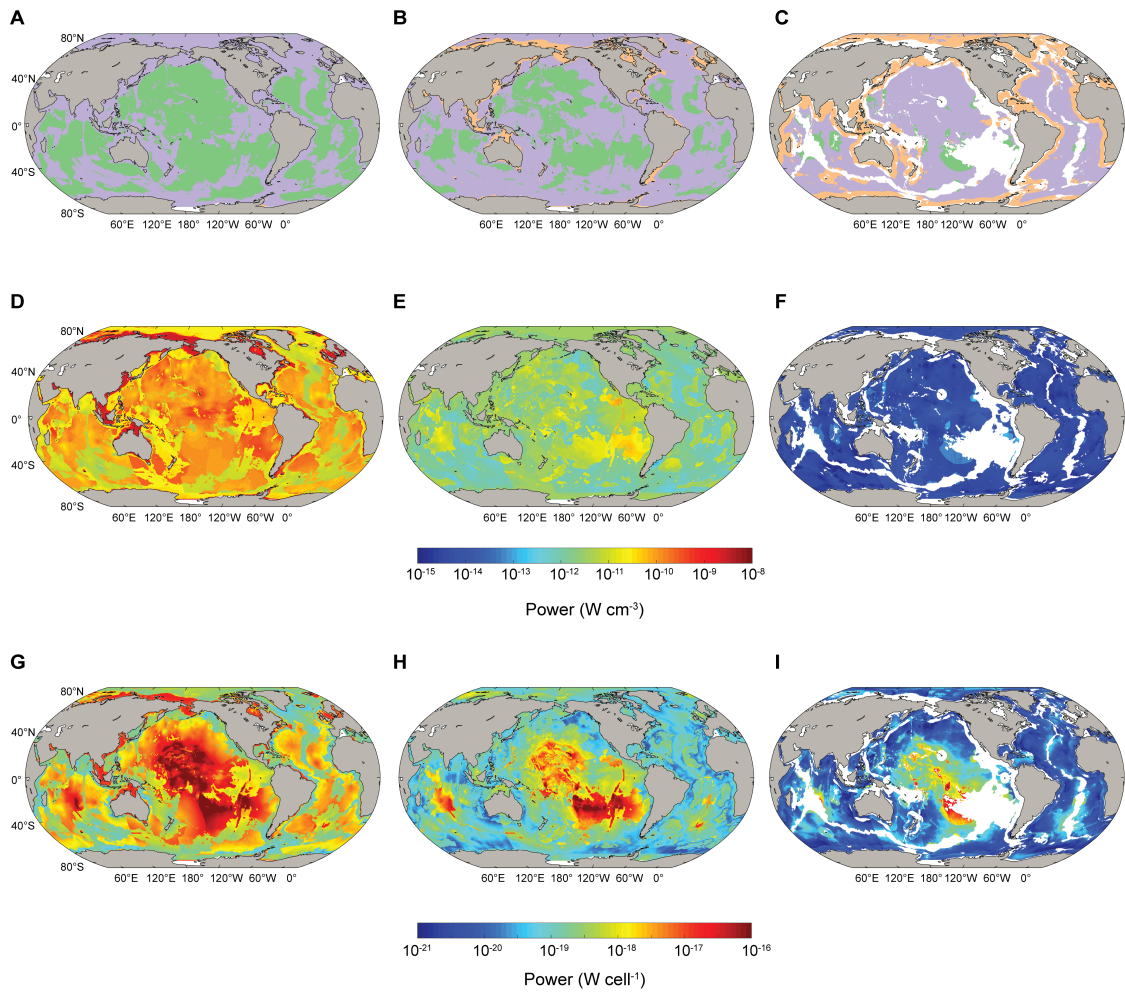

**Fig. S2. Global distribution of catabolic zones and microbial power production.** Global maps depicting (A-C) the major catabolic pathway of OC oxidation at 10cm beneath the seafloor, the layer of sediment deposited at the beginning of the Holocene (11,700 years ago), and the layer of sediment deposited at the beginning of the Pleistocene (2.59 million years ago). Green shading represents oxic sediments, lilac denotes sulfate-reducing sediments, and orange signifies methanogenic sediments; (D-F) Power produced by microbial POC degradation ( $\text{W cm}^{-3}$ ) in sediment 10 cm beneath the seafloor, 11,700 year-old sediment, and 2.59 million year-old sediment respectively. (G-I) Microbial power production ( $\text{W cell}^{-1}$ ) in sediment 10 cm beneath the seafloor, 11,700 year-old sediment, and 2.59 million year-old sediment respectively. White shading (C, F, I) represents locations where there is no Pleistocene sediment (i.e. sediment age does not extend to (or beyond) the beginning of the Pleistocene).

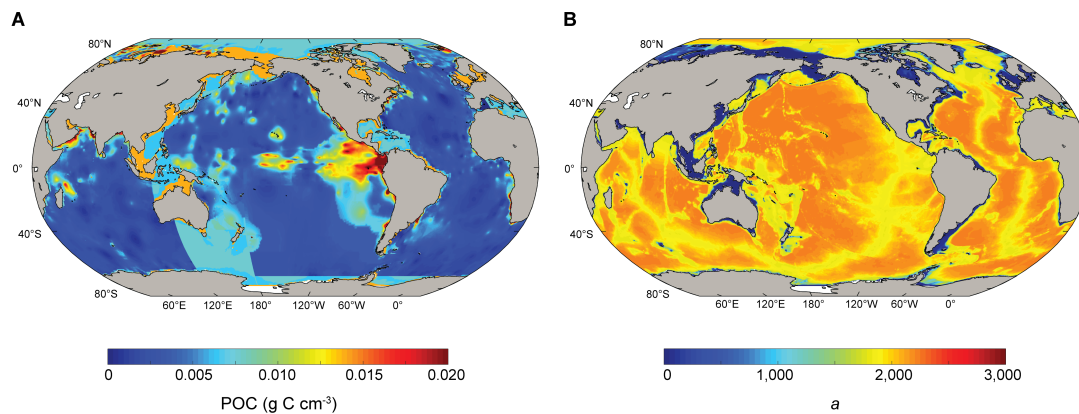

**Fig. S3. Geographical distribution and reactivity of POC at the sediment-water interface.** Global maps depicting (A) the POC concentration at the SWI ( $\text{g C cm}^{-3}$ ) and (B) the reactive continuum model parameter  $a$  (years), representing the average lifetime of reactive components of the POC. Low  $a$  values indicate a mixture of POC dominated by more recently formed (i.e. younger) compounds that are typically degraded rapidly, whereas high  $a$  values indicate a larger fraction of ancient compounds that degrade slowly.

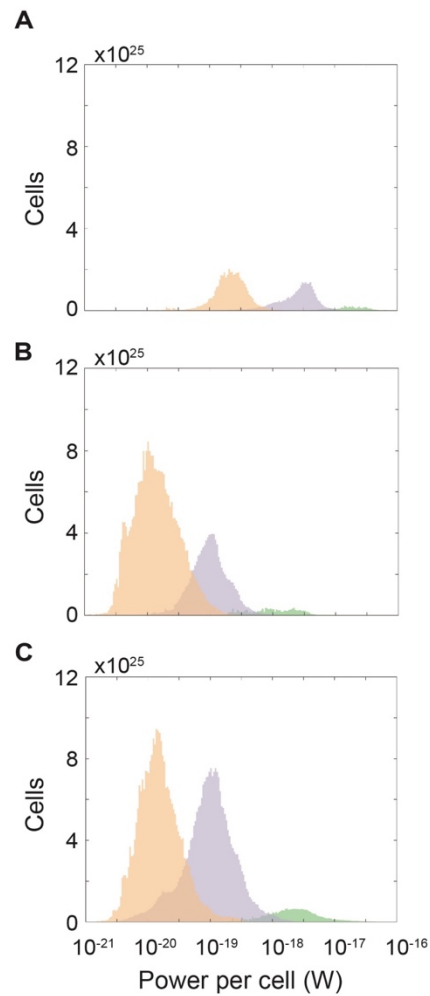

**Fig S4. Frequency distribution of microbial power production.** Microbial power production in (A) continental shelf sediments, (B) margins sediments and (C) abyssal sediments. Green denotes oxic sediment, lilac signifies sulfate-reducing sediment, and orange represents methanogenic sediment.

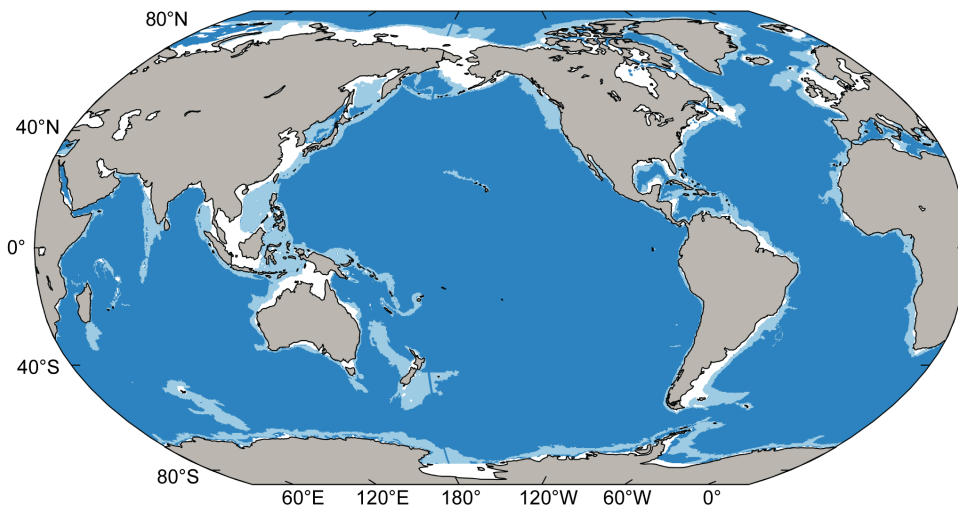

**Fig S5. Geographic distribution of major sediment domains.** Shelf (white), margin (light blue) and abyss (dark blue) domains considered in this study.

| Reaction no. | Metabolism           | Reaction                                                     |
|--------------|----------------------|--------------------------------------------------------------|
| 1            | Aerobic heterotrophy | $C_2H_3O_2^- + 2O_2 \rightleftharpoons H^+ + 2HCO_3^-$       |
| 2            | Sulfate reduction    | $C_2H_3O_2^- + SO_4^{2-} \rightleftharpoons HS^- + 2HCO_3^-$ |
| 3            | Methanogenesis       | $C_2H_3O_2^- + H_2O \rightleftharpoons CH_4 + HCO_3^-$       |

**Table S1. Catabolic pathways for POC oxidation considered in this study.**

| Metabolism           | $\Delta G_r$ | $C_2H_3O_2^-$          | $O_2$                | $HCO_3^-$           | $SO_4^{2-}$         | $HS^-$                          | $CH_4$               | pH                |
|----------------------|--------------|------------------------|----------------------|---------------------|---------------------|---------------------------------|----------------------|-------------------|
| Aerobic heterotrophy |              |                        |                      |                     |                     |                                 |                      |                   |
| <i>Nominal</i>       | -34.7200     | 0.00063 <sup>a,b</sup> | 0.00008 <sup>c</sup> | 0.0023 <sup>c</sup> |                     |                                 |                      | 7.78 <sup>c</sup> |
| <i>Low energy</i>    | -34.4630     | 0.00020 <sup>a,b</sup> | 0.00005 <sup>c</sup> | 0.0020 <sup>c</sup> |                     |                                 |                      | 7.78 <sup>c</sup> |
| <i>High energy</i>   | -34.8129     | 0.00100 <sup>a,b</sup> | 0.00011 <sup>c</sup> | 0.0026 <sup>c</sup> |                     |                                 |                      | 7.78 <sup>c</sup> |
| Sulfate reduction    |              |                        |                      |                     |                     |                                 |                      |                   |
| <i>Nominal</i>       | -2.6833      | 0.00063 <sup>a,b</sup> |                      | 0.0250 <sup>d</sup> | 0.0154 <sup>e</sup> | $1 \times 10^{-6}$ <sup>d</sup> |                      |                   |
| <i>Low energy</i>    | -2.1370      | 0.00020 <sup>a,b</sup> |                      | 0.0400 <sup>d</sup> | 0.0028 <sup>e</sup> | $5 \times 10^{-6}$ <sup>d</sup> |                      |                   |
| <i>High energy</i>   | -2.9842      | 0.00100 <sup>a,b</sup> |                      | 0.0100 <sup>d</sup> | 0.0280 <sup>e</sup> | $1 \times 10^{-7}$ <sup>d</sup> |                      |                   |
| Methanogenesis       |              |                        |                      |                     |                     |                                 |                      |                   |
| <i>Nominal</i>       | -0.9872      | 0.00063 <sup>a,b</sup> |                      | 0.0280 <sup>d</sup> |                     |                                 | 0.00060 <sup>d</sup> |                   |
| <i>Low energy</i>    | -0.7735      | 0.00020 <sup>a,b</sup> |                      | 0.0330 <sup>d</sup> |                     |                                 | 0.00100 <sup>d</sup> |                   |
| <i>High energy</i>   | -1.3406      | 0.00100 <sup>a,b</sup> |                      | 0.0230 <sup>d</sup> |                     |                                 | 0.00002 <sup>d</sup> |                   |

**Table S2. Gibbs energies and concentrations of reactants and products used to calculate the Gibbs energies for each catabolic reaction, as well as to address uncertainty in these values.** Gibbs energies are provided in  $\text{kJ g}^{-1} \text{C}$ . Concentrations are provided in moles (M). Concentrations for the various scenarios are taken from the literature and are intended to represent the variation that is present in typical sedimentary settings and not extreme values that are not globally representative. <sup>a</sup> ref. (91); <sup>b</sup> Ref. (92); <sup>c</sup> Ref. (2); <sup>d</sup> Ref. (70); <sup>e</sup> Ref. (9).



| Parameter | Definition                                                     | Shelf                                         | Margin                                        | Abyss                                         | Units           |
|-----------|----------------------------------------------------------------|-----------------------------------------------|-----------------------------------------------|-----------------------------------------------|-----------------|
| $\Phi_0$  | Sediment porosity at the sediment-water interface <sup>a</sup> | 0.45 <sup>a</sup>                             | 0.74 <sup>a</sup>                             | 0.70 <sup>a</sup>                             |                 |
| $c_0$     | Sediment compaction length scale <sup>b</sup>                  | $0.50 \times 10^{-3}$ <sup>b</sup>            | $1.70 \times 10^{-4}$ <sup>b,c</sup>          | $0.85 \times 10^{-3}$ <sup>b</sup>            | m <sup>-1</sup> |
| $a$       | Reactive continuum age parameter                               |                                               |                                               |                                               | years           |
|           | <i>Nominal</i>                                                 | $10^{(3.35-14.81 \cdot \omega)}$ <sup>d</sup> | $10^{(3.35-14.81 \cdot \omega)}$ <sup>d</sup> | $10^{(3.35-14.81 \cdot \omega)}$ <sup>d</sup> |                 |
|           | <i>Low reactivity</i>                                          | 5.0 <sup>e</sup>                              | $3.0 \times 10^3$ <sup>f</sup>                | $3.5 \times 10^4$ <sup>g</sup>                |                 |
|           | <i>High reactivity</i>                                         | $3.0 \times 10^{-4}$ <sup>h</sup>             | $3.0 \times 10^{-4}$ <sup>h</sup>             | 20.0                                          |                 |
| $\nu$     | Reactive continuum distribution parameter                      |                                               |                                               |                                               |                 |
|           | <i>Nominal</i>                                                 | 0.125                                         | 0.125                                         | 0.125                                         |                 |
|           | <i>Low reactivity</i>                                          | 0.135 <sup>e</sup>                            | 0.160 <sup>f</sup>                            | 0.160 <sup>g</sup>                            |                 |
|           | <i>High reactivity</i>                                         | 0.125 <sup>h</sup>                            | 0.125 <sup>h</sup>                            | 0.160 <sup>i</sup>                            |                 |

**Table S3. Parameter values used to characterize the porosity and organic matter content of continental shelf, margin and abyss domains of marine sediments.**

<sup>a</sup> Ref. (93); <sup>b</sup> These values are representative of a sandstone-siltstone mixture (shelf), a sandstone-siltstone- shale combination (margin) and typical shales and biogenic-dominated sediments (abyss) (49); <sup>c</sup> Ref. (37); <sup>d</sup> based on global compilation by ref. (28),  $\omega$  represents sedimentation rate (cm yr<sup>-1</sup>); <sup>e</sup> Ref. (94), Arkona Basin; <sup>f</sup> Ref. (95), Sea of Okhotsk; <sup>g</sup> Ref. (96), Central Pacific; <sup>h</sup> Refs. (41,97), fresh plankton material from Long Island Sound; <sup>i</sup> Ref. (98), Peru.

| Authors & Year             | Journal                  | Reference | Station      | Water Depth (km) | Oxygen Penetration Depth (mm) | Lat      | Long     |
|----------------------------|--------------------------|-----------|--------------|------------------|-------------------------------|----------|----------|
| Glud et al, 1994           | DSR I 41,<br>1767-1788   | (99)      | 1702         | 3.107            | 33.0                          | -6.5533  | 10.3167  |
| Glud et al, 1994           | DSR I 41,<br>1767-1788   | (99)      | 1703         | 1.747            | 10.0                          | -17.4467 | 11.0133  |
| Glud et al, 1994           | DSR I 41,<br>1767-1788   | (99)      | 1708         | 2.321            | 25.0                          | -20.0967 | 8.9667   |
| Glud et al, 1994           | DSR I 41,<br>1767-1788   | (99)      | 1711         | 1.947            | 22.0                          | -23.3400 | 12.3817  |
| Glud et al, 1994           | DSR I 41,<br>1767-1788   | (99)      | 1713         | 0.604            | 5.6                           | -23.2383 | 13.0133  |
| Glud et al, 1994           | DSR I 41,<br>1767-1788   | (99)      | 1719         | 1.015            | 13.0                          | -28.9517 | 14.1750  |
| Glud et al, 1994           | DSR I 41,<br>1767-1788   | (99)      | 1721         | 3.095            | 55.0                          | -29.1933 | 13.0900  |
| Glud et al, 1994           | DSR I 41,<br>1767-1788   | (99)      | 1723         | 4.986            | 200.0                         | -29.8850 | 8.6650   |
| Glud et al, 1999           | MEPS 186:<br>9-20        | (51)      | GeoB<br>3323 | 3.459            | 37.8                          | -43.2167 | -76.0000 |
| Glud et al, 1999           | MEPS 186:<br>9-22        | (51)      | GeoB<br>3337 | 4.079            | 129.7                         | -35.2500 | -86.0000 |
| Glud et al, 1999           | MEPS 186:<br>9-23        | (51)      | GeoB<br>3350 | 2.470            | 12.6                          | -35.2550 | -73.4167 |
| Glud et al, 1999           | MEPS 186:<br>9-24        | (51)      | GeoB<br>3355 | 1.445            | 11.1                          | -35.2167 | -73.1117 |
| Glud et al, 1999           | MEPS 186:<br>9-25        | (51)      | GeoB<br>3356 | 0.580            | 6.5                           | -35.2183 | -73.2033 |
| Glud et al, 2003           | LaO 48(3):<br>1265-1276  | (100)     | 6            | 0.016            | 2.5                           | 56.1517  | 10.3200  |
| Glud et al, 2003           | LaO 48(3):<br>1265-1276  | (100)     | 6            | 0.016            | 4.5                           | 56.1517  | 10.3200  |
| Glud et al, 1998           | MEPS 173:<br>237-251     | (101)     | SV-1         | 0.329            | 9.9                           | 69.4900  | -18.1250 |
| Glud et al, 1998           | MEPS 173:<br>237-252     | (101)     | SV-2         | 0.155            | 5.5                           | 76.9700  | -15.5750 |
| Glud et al, 1998           | MEPS 173:<br>237-253     | (101)     | SV-3         | 0.115            | 9.6                           | 77.7633  | -15.0650 |
| Glud et al, 1998           | MEPS 173:<br>237-254     | (101)     | SV-4         | 0.138            | 9.3                           | 76.9617  | -15.0033 |
| Glud et al, 1998           | MEPS 173:<br>237-255     | (101)     | SV-5         | 0.175            | 10.9                          | 77.5500  | -19.0833 |
| Wenzhoefer et al,<br>2001a | DSR I 48:<br>1741-1755   | (102)     | 4401         | 3.350            | 80.0                          | 4.7600   | -43.7583 |
| Wenzhoefer et al,<br>2001a | DSR I 48:<br>1741-1755   | (102)     | 4409         | 3.850            | 90.0                          | 3.6417   | -45.2400 |
| Wenzhoefer et al,<br>2001a | DSR I 48:<br>1741-1755   | (102)     | 4417         | 3.510            | 120.0                         | 5.1450   | -46.5600 |
| Wenzhoefer et al,<br>2001a | DSR I 48:<br>1741-1755   | (102)     | 4419         | 4.486            | 110.0                         | 9.6700   | -54.2583 |
| Wenzhoefer et al,<br>2001a | DSR I 48:<br>1741-1755   | (102)     | 4421         | 3.180            | 260.0                         | 16.9850  | -46.0150 |
| Wenzhoefer et al,<br>2001b | GCA 65(16):<br>2677-2690 | (103)     | 4909         | 1.310            | 25.0                          | -2.0733  | 8.6267   |
| Wenzhoefer et al,<br>2001b | GCA 65(16):<br>2677-2690 | (103)     | 4913         | 1.300            | 15.0                          | -5.5000  | 11.0733  |
| Wenzhoefer et al,<br>2001b | GCA 65(16):<br>2677-2690 | (103)     | 4917         | 1.300            | 14.0                          | -11.9067 | 13.0717  |
| Wenzhoefer et al,<br>2001b | GCA 65(16):<br>2677-2690 | (103)     | 6214         | 1.566            | 28.0                          | -34.5200 | -51.4383 |
| Wenzhoefer et al,<br>2001b | GCA 65(16):<br>2677-2690 | (103)     | 6219         | 3.550            | 55.5                          | -35.1850 | -50.5650 |
| Wenzhoefer et al,<br>2001b | GCA 65(16):<br>2677-2690 | (103)     | 6229         | 3.442            | 33.5                          | -37.2133 | -52.6517 |

|                         |                                           |       |                |       |       |          |          |
|-------------------------|-------------------------------------------|-------|----------------|-------|-------|----------|----------|
| Wenzhoefer et al, 2001b | GCA 65(16):<br>2677-2690                  | (103) | 4901           | 2.185 | 90.0  | 2.6800   | 6.7300   |
| Wenzhoefer et al, 2001b | GCA 65(16):<br>2677-2690                  | (103) | 4906           | 1.275 | 15.5  | -0.6867  | 8.3817   |
| Jahnke et al, 1989      | GCA 53:<br>2947-2960                      | (104) | J4             | 1.007 | 20.0  | 9.2383   | -16.9950 |
| Jahnke et al, 1989      | GCA 53:<br>2947-2960                      | (104) | J6             | 4.470 | 80.0  | 8.3833   | -17.6100 |
| Wenzhöfer & Glud, 2002  | DSR I 49:<br>1255-1279                    | (105) | 2101           | 1.809 | 38.0  | -23.9950 | -41.2083 |
| Wenzhöfer & Glud, 2002  | DSR I 49:<br>1255-1279                    | (105) | 2103           | 1.047 | 26.0  | -27.1750 | -46.4633 |
| Wenzhöfer & Glud, 2002  | DSR I 49:<br>1255-1279                    | (105) | 3705           | 1.305 | 13.0  | -24.3117 | 12.9983  |
| Wenzhöfer & Glud, 2002  | DSR I 49:<br>1255-1279                    | (105) | 3706           | 1.323 | 16.0  | -22.7250 | 12.6050  |
| Wenzhöfer & Glud, 2002  | DSR I 49:<br>1255-1279                    | (105) | 3707           | 1.355 | 11.6  | -21.6300 | 12.1967  |
| Wenzhöfer & Glud, 2002  | DSR I 49:<br>1255-1279                    | (105) | 3718           | 1.310 | 9.7   | -24.8983 | 13.1667  |
| Wenzhöfer & Glud, 2002  | DSR I 49:<br>1255-1279                    | (105) | 3719           | 1.995 | 19.8  | -24.9983 | 12.8667  |
| Wenzhöfer & Glud, 2002  | DSR I 49:<br>1255-1279                    | (105) | 3721           | 3.017 | 22.8  | -28.1467 | 12.4033  |
| Wenzhöfer & Glud, 2002  | DSR I 49:<br>1255-1279                    | (105) | 4234           | 1.362 | 75.0  | 28.8883  | -13.2250 |
| Witte et al, 2003       | MEPS 251:<br>27-36                        | (106) | Sognefjord     | 1.265 | 16.8  | 61.1420  | 6.0203   |
| Witte et al, 2003       | Nature 424,<br>763-766                    | (107) | PAP            | 4.800 | 150.0 | 48.8333  | -16.5833 |
| Black et al, 2001       | Cont. Shelf<br>Res. 21, 859-<br>877       | (108) | A              | 1.100 | 78.0  | 52.9068  | -16.9095 |
| Black et al, 2001       | Cont. Shelf<br>Res. 21, 859-<br>877       | (108) | B              | 3.570 | 21.0  | 57.3885  | -15.7107 |
| Glud et al, 2009        | LaO 54 (1),<br>1-12                       | (109) | OBBII<br>09/03 | 1.450 | 3.5   | 35.0143  | 139.3598 |
| Glud et al, 2009        | LaO 54 (1),<br>1-12                       | (109) | OBBII<br>03/06 | 1.450 | 6.3   | 35.0143  | 139.3598 |
| Glud et al, 2009        | LaO 54 (1),<br>1-12                       | (109) | OBBII<br>12/06 | 1.450 | 6.6   | 35.0143  | 139.3598 |
| Glud et al, 2009        | LaO 54 (1),<br>1-12                       | (109) | OBBII<br>01/08 | 1.450 | 7.1   | 35.0143  | 139.3598 |
| Giordani et al, 2002    | J of Marine<br>Systems 33-<br>23: 365-387 | (110) | P1             | 0.246 | 20.0  | 42.8500  | 14.7500  |
| Giordani et al, 2002    | J of Marine<br>Systems 33-<br>23: 365-387 | (110) | A1             | 1.196 | 50.0  | 41.8457  | 17.7452  |
| Giordani et al, 2002    | J of Marine<br>Systems 33-<br>23: 365-387 | (110) | O2             | 0.870 | 40.0  | 39.8287  | 18.9580  |
| Lansard et al, 2008     | Cont. Shelf<br>Res. 28,<br>1501-1510      | (107) | Rhone-1        | 0.063 | 2.6   | 43.3067  | 4.8850   |
| Lansard et al, 2008     | Cont. Shelf<br>Res. 28,<br>1501-1510      | (111) | Rhone-2        | 0.098 | 6.4   | 43.2417  | 4.8972   |
| Lansard et al, 2008     | Cont. Shelf<br>Res. 28,<br>1501-1510      | (111) | Sofi           | 0.192 | 14.5  | 43.0667  | 5.1267   |
| Lansard et al, 2009     | ECSS 81,<br>544-554                       | (112) | 1              | 0.020 | 1.4   | 43.3150  | 4.8533   |
| Lansard et al, 2009     | ECSS 81,<br>544-554                       | (112) | 3              | 0.053 | 2.4   | 43.3050  | 4.8350   |

|                         |                        |       |       |       |       |          |          |
|-------------------------|------------------------|-------|-------|-------|-------|----------|----------|
| Lansard et al, 2009     | ECSS 81,<br>544-554    | (112) | 4     | 0.060 | 3.0   | 43.3033  | 4.8583   |
| Lansard et al, 2009     | ECSS 81,<br>544-554    | (112) | 5     | 0.063 | 2.1   | 43.3067  | 4.8850   |
| Lansard et al, 2009     | ECSS 81,<br>544-554    | (112) | 6     | 0.040 | 2.8   | 43.2950  | 4.7500   |
| Lansard et al, 2009     | ECSS 81,<br>544-554    | (112) | 13    | 0.075 | 4.5   | 43.2717  | 4.7750   |
| Lansard et al, 2009     | ECSS 81,<br>544-554    | (112) | 14    | 0.085 | 3.4   | 43.2650  | 4.8217   |
| Lansard et al, 2009     | ECSS 81,<br>544-554    | (112) | 16    | 0.083 | 7.4   | 43.2683  | 4.9683   |
| Lansard et al, 2009     | ECSS 81,<br>544-554    | (112) | 17    | 0.073 | 4.6   | 43.2483  | 4.7317   |
| Lansard et al, 2009     | ECSS 81,<br>544-554    | (112) | 22    | 0.074 | 4.2   | 43.2200  | 4.6967   |
| Sachs et al, 2009       | DSR I 56,<br>1319-1335 | (113) | 85-1  | 2.995 | 42.0  | -52.0190 | 0.0012   |
| Sachs et al, 2009       | DSR I 56,<br>1319-1335 | (113) | 84-1  | 3.004 | 42.0  | -52.2003 | 0.0028   |
| Sachs et al, 2009       | DSR I 56,<br>1319-1335 | (113) | 47-1  | 1.843 | 10.0  | -69.6733 | 1.0373   |
| Sachs et al, 2009       | DSR I 56,<br>1319-1335 | (113) | 39-4  | 2.125 | 57.0  | -64.5032 | 2.8760   |
| Sachs et al, 2009       | DSR I 56,<br>1319-1335 | (113) | 705-1 | 4.293 | 90.0  | -49.0017 | 12.2550  |
| Sachs et al, 2009       | DSR I 56,<br>1319-1335 | (113) | 703-1 | 3.330 | 25.0  | -52.5850 | 9.0033   |
| Sachs et al, 2009       | DSR I 56,<br>1319-1335 | (113) | 600-1 | 3.589 | 55.0  | -49.9983 | 2.3367   |
| Sachs et al, 2009       | DSR I 56,<br>1319-1335 | (113) | 598-1 | 3.942 | 85.0  | -49.3083 | 2.1950   |
| Sachs et al, 2009       | DSR I 56,<br>1319-1335 | (113) | 972   | 4.091 | 14.0  | -48.5017 | -6.0033  |
| Sachs et al, 2009       | DSR I 56,<br>1319-1335 | (113) | 891   | 3.117 | 35.0  | -55.0083 | -6.0050  |
| Canfield et al,<br>1993 | Mar Geol<br>113 27-40  | (114) | S4    | 0.190 | 7.5   | 58.1695  | 10.0727  |
| Canfield et al,<br>1993 | Mar Geol<br>113 27-40  | (114) | S9    | 0.695 | 17.0  | 58.6227  | 10.2878  |
| Larsen et al,           | Unpublished            |       |       | 0.650 | 2.6   | -12.5125 | -77.5695 |
| Larsen et al,           | Unpublished            |       |       | 0.750 | 3.9   | -12.5238 | -77.5827 |
| Larsen et al,           | Unpublished            |       |       | 1.000 | 4.7   | -12.5897 | -77.6832 |
| Wenzhoefer et al,       | Unpublished            |       |       | 2.470 | 74.0  | 79.0070  | 4.3317   |
| Wenzhoefer et al,       | Unpublished            |       |       | 2.340 | 109.0 | 79.0667  | 4.0018   |
| Glud et al.             | Unpublished            |       | St 13 | 0.630 | 11.4  | 64.3667  | -51.6233 |
| Glud et al.             | Unpublished            |       | St 17 | 0.579 | 17.6  | 64.6100  | -50.9583 |
| Glud et al.             | Unpublished            |       | St 20 | 0.476 | 10.8  | 64.6800  | -50.2883 |
| Glud et al.             | Unpublished            |       | St 14 | 0.453 | 12.4  | 64.4200  | -51.5100 |
| Glud et al.             | Unpublished            |       | St 8  | 0.273 | 6.2   | 63.9500  | -52.3667 |
| Glud et al.             | Unpublished            |       | LE    | 0.060 | 4.0   | 59.4555  | 5.1875   |

**Table S4. Supporting data used to inform regression model of O<sub>2</sub> penetration depth in global sediments.** These data were compiled by Ronnie Glud (University of Southern Denmark) and Frank Wenzhöfer (Alfred Wegener Institute, Bremerhaven).

## REFERENCES AND NOTES

1. J. Kallmeyer, R. Pockalny, R. R. Adhikari, D. C. Smith, S. D'Hondt, Global distribution of microbial abundance and biomass in subseafloor sediment. *Proc. Natl. Acad. Sci. U.S.A.* **109**, 16213–16216 (2012).
2. S. D'Hondt, F. Inagaki, C. A. Zarikian, L. J. Abrams, N. Dubois, T. Engelhardt, H. Evans, T. Ferdelman, B. Gribsholt, R. N. Harris, B. W. Hoppie, J.-H. Hyun, J. Kallmeyer, J. Kim, J. E. Lynch, C. C. McKinley, S. Mitsunobu, Y. Morono, R. W. Murray, R. Pockalny, J. Sauvage, T. Shimono, F. Shiraishi, D. C. Smith, C. E. Smith-Duque, A. J. Spivack, B. O. Steinsbu, Y. Suzuki, M. Szpak, L. Toffin, G. Uramoto, Y. T. Yamaguchi, G.-l. Zhang, X.-H. Zhang, W. Ziebis, Presence of oxygen and aerobic communities from sea floor to basement in deep-sea sediments. *Nat. Geosci.* **8**, 299–304 (2015).
3. B. B. Jørgensen, I. P. G. Marshall, Slow microbial life in the seabed. *Ann. Rev. Mar. Sci.* **8**, 311–332 (2016).
4. K. G. Lloyd, L. Schreiber, D. G. Petersen, K. U. Kjeldsen, M. A. Lever, A. D. Steen, R. Stepanauskas, M. Richter, S. Kleindienst, S. Lenk, A. Schramm, B. B. Jørgensen, Predominant archaea in marine sediments degrade detrital proteins. *Nature* **496**, 215–218 (2013).
5. J. S. Lipp, Y. Morono, F. Inagaki, K.-U. Hinrichs, Significant contribution of Archaea to extant biomass in marine subsurface sediments. *Nature* **454**, 991–994 (2008).
6. H. Røy, J. Kallmeyer, R. R. Adhikari, R. Pockalny, B. B. Jørgensen, S. D'Hondt, Aerobic microbial respiration in 86-million-year-old deep-sea red clay. *Science* **336**, 922–925 (2012).
7. R. J. Parkes, B. Cragg, E. Roussel, G. Webster, A. Weightman, H. Sass, A review of prokaryotic populations and processes in sub-seafloor sediments, including biosphere:geosphere interactions. *Mar. Geol.* **352**, 409–425 (2014).
8. D. H. Rothman, Atmospheric carbon dioxide levels for the last 500 million years. *Proc. Natl. Acad. Sci. U.S.A.* **99**, 4167–4171 (2002).

9. S. D'Hondt, B. B. Jørgensen, D. J. Miller, A. Batzke, R. Blake, B. A. Cragg, H. Cypionka, G. R. Dickens, T. Ferdelman, K.-U. Hinrichs, N. G. Holm, R. Mitterer, A. Spivack, G. Wang, B. Bekins, B. Engelen, K. Ford, G. Gettemy, S. D. Rutherford, H. Sass, C. G. Skilbeck, I. W. Aiello, G. Guèrin, C. H. House, F. Inagaki, P. Meister, T. Naehr, S. Niitsuma, R. J. Parkes, A. Schippers, D. C. Smith, A. Teske, J. Wiegel, C. N. Padilla, J. L. S. Acosta, Distributions of microbial activities in deep seafloor sediments. *Science* **306**, 2216–2221 (2004).
10. B. B. Jørgensen, S. D'Hondt, A starving majority deep beneath the seafloor. *Science* **314**, 932–934 (2006).
11. E. Trembath-Reichert, Y. Morono, A. Ijiri, T. Hoshino, K. S. Dawson, F. Inagaki, V. J. Orphan, Methyl-compound use and slow growth characterize microbial life in 2-km-deep seafloor coal and shale beds. *Proc. Natl. Acad. Sci. U.S.A.* **114**, E9206–E9215 (2017).
12. F. Inagaki, K.-U. Hinrichs, Y. Kubo, M. W. Bowles, V. B. Heuer, W.-L. Hong, T. Hoshino, A. Ijiri, H. Imachi, M. Ito, M. Kaneko, M. A. Lever, Y.-S. Lin, B. A. Methé, S. Morita, Y. Morono, W. Tanikawa, M. Bihan, S. A. Bowden, M. Elvert, C. Glombitza, D. Gross, G. J. Harrington, T. Hori, K. Li, D. Limmer, C.-H. Liu, M. Murayama, N. Ohkouchi, S. Ono, Y.-S. Park, S. C. Phillips, X. Prieto-Mollar, M. Purkey, N. Riedinger, Y. Sanada, J. Sauvage, G. Snyder, R. Susilawati, Y. Takano, E. Tasumi, T. Terada, H. Tomaru, E. Trembath-Reichert, D. T. Wang, Y. Yamada, Exploring deep microbial life in coal-bearing sediment down to ~2.5 km below the ocean floor. *Science* **349**, 420–424 (2015).
13. D. E. LaRowe, J. P. Amend, Power limits for microbial life. *Front. Microbiol.* **6**, 718 (2015).
14. Y. Morono, T. Terada, M. Nishizawa, M. Ito, F. Hillion, N. Takahata, Y. Sano, F. Inagaki, Carbon and nitrogen assimilation in deep seafloor microbial cells. *Proc. Natl. Acad. Sci. U.S.A.* **108**, 18295–18300 (2011).
15. P. Starnawski, T. Bataillon, T. J. G. Ettema, L. M. Jochum, L. Schreiber, X. Chen, M. A. Lever, M. F. Polz, B. B. Jørgensen, A. Schramm, K. U. Kjeldsen, Microbial community assembly and evolution in seafloor sediment. *Proc. Natl. Acad. Sci. U.S.A.* **114**, 2940–2945 (2017).

16. W. D. Orsi, V. P. Edgcomb, G. D. Christman, J. F. Biddle, Gene expression in the deep biosphere. *Nature* **499**, 205–208 (2013).
17. E. R. Estes, R. Pockalny, S. D'Hondt, F. Inagaki, Y. Morono, R. W. Murray, D. Nordlund, A. J. Spivack, S. D. Wankel, N. Xiao, C. M. Hansel, Persistent organic matter in oxic subseafloor sediment. *Nat. Geosci.* **12**, 126–131 (2019).
18. D. Canfield, E. Kristensen, B. Thamdrup, *Advances in Marine Biology: Aquatic Geomicrobiology* (Academic Press, 2005).
19. B. B. Jørgensen, Mineralization of organic matter in the sea bed—The role of sulphate reduction. *Nature* **296**, 643–645 (1982).
20. T. K. Tromp, P. Van Cappellen, R. M. Key, A global model for the early diagenesis of organic carbon and organic phosphorus in marine sediments. *Geochim. Cosmochim. Acta* **59**, 1259–1284 (1995).
21. B. B. Jørgensen, S. Kasten, Sulfur cycling and methane oxidation, in *Marine Geochemistry*, H. D. Schulz, M. Zabel, Eds. (Springer Berlin Heidelberg, 2006), pp. 271–309.
22. K. H. Nealson, P. G. Conrad, Life: Past, present and future. *Philos. Trans. R. Soc. Lond. B Biol. Sci.* **354**, 1923–1939 (1999).
23. C. B. Field, M. J. Behrenfeld, J. T. Randerson, P. Falkowski, Primary production of the biosphere: Integrating terrestrial and oceanic components. *Science* **281**, 237–240 (1998).
24. E. Marschall, M. Jogler, U. Henßge, J. Overmann, Large-scale distribution and activity patterns of an extremely low-light-adapted population of green sulfur bacteria in the Black Sea. *Environ. Microbiol.* **12**, 1348–1362 (2010).
25. L. Tijhuis, M. C. Van Loosdrecht, J. J. Heijnen, A thermodynamically based correlation for maintenance Gibbs energy requirements in aerobic and anaerobic chemotrophic growth. *Biotechnol. Bioeng.* **42**, 509–519 (1993).

26. F. Beulig, H. Røy, C. Glombitza, B. B. Jørgensen, Control on rate and pathway of anaerobic organic carbon degradation in the seabed. *Proc. Natl. Acad. Sci. U.S.A.* **115**, 367–372 (2018).
27. T. M. McCollom, J. P. Amend, A thermodynamic assessment of energy requirements for biomass synthesis by chemolithoautotrophic micro-organisms in oxic and anoxic environments. *Geobiology* **3**, 135–144 (2005).
28. M. A. Lever, K. L. Rogers, K. G. Lloyd, J. Overmann, B. Schink, R. K. Thauer, T. M. Hoehler, B. B. Jørgensen, Life under extreme energy limitation: A synthesis of laboratory- and field-based investigations. *FEMS Microbiol. Rev.* **39**, 688–728 (2015).
29. S. Arndt, B. B. Jørgensen, D. E. LaRowe, J. J. Middelburg, R. D. Pancost, P. Regnier, Quantifying the degradation of organic matter in marine sediments: A review and synthesis. *Earth Sci. Rev.* **123**, 53–86 (2013).
30. J. A. Bradley, J. P. Amend, D. E. LaRowe, Necromass as a limited source of energy for microorganisms in marine sediments. *J. Geophys. Res. Biogeosci.* **123**, 577–590 (2018).
31. S. Braun, S. S. Mhatre, M. Jaussi, H. Røy, K. U. Kjeldsen, C. Pearce, M.-S. Seidenkrantz, B. B. Jørgensen, B. A. Lomstein, Microbial turnover times in the deep seabed studied by amino acid racemization modelling. *Sci. Rep.* **7**, 5680 (2017).
32. Y. M. Bar-On, R. Phillips, R. Milo, The biomass distribution on Earth. *Proc. Natl. Acad. Sci. U.S.A.* **115**, 6506–6511 (2018).
33. C. Magnabosco, L.-H. Lin, H. Dong, M. Bomberg, W. Ghiorse, H. Stan-Lotter, K. Pedersen, T. L. Kieft, E. van Heerden, T. C. Onstott, The biomass and biodiversity of the continental subsurface. *Nat. Geosci.* **11**, 707–717 (2018).
34. S. E. Jones, J. T. Lennon, Dormancy contributes to the maintenance of microbial diversity. *Proc. Natl. Acad. Sci. U.S.A.* **107**, 5881–5886 (2010).
35. J. T. Lennon, S. E. Jones, Microbial seed banks: The ecological and evolutionary implications of dormancy. *Nat. Rev. Microbiol.* **9**, 119–130 (2011).



36. D. E. LaRowe, S. Arndt, J. A. Bradley, E. Burwicz, A. W. Dale, J. P. Amend, Organic carbon and microbial activity in marine sediments on a global scale throughout the Quaternary. *EarthArXiv* 10.31223/osf.io/fj5tz (2020).
37. K. Wallmann, E. Pinero, E. Burwicz, M. Haeckel, C. Hensen, A. Dale, L. Ruepke, The global inventory of methane hydrate in marine sediments: A theoretical approach. *Energies* **5**, 2449–2498 (2012).
38. R. A. Berner, Early diagenesis: A theoretical approach, in *Princeton Series in Geochemistry* (Princeton Univ. Press, 1980).
39. B. P. Boudreau, *Diagenetic Models and Their Implementation: Modelling Transport and Reactions in Aquatic Sediments* (Springer, 1997), vol. 171.
40. L. F. Athy, Density, porosity, and compaction of sedimentary rocks. *Am. Assoc. Pet. Geol. Bull.* **14**, 1–24 (1930).
41. B. P. Boudreau, B. R. Ruddick, On a reactive continuum representation of organic matter diagenesis. *Am. J. Sci.* **291**, 507–538 (1991).
42. R. Aris, Prolegomena to the rational analysis of systems of chemical reactions II. Some addenda. *Arch. Ration. Mech. Anal.* **27**, 356–364 (1968).
43. T. C. Ho, R. Aris, On apparent second-order kinetics. *AIChE J.* **33**, 1050–1051 (1987).
44. A. W. Dale, L. Nickelsen, F. Scholz, C. Hensen, A. Oschlies, K. Wallmann, A revised global estimate of dissolved iron fluxes from marine sediments. *Global Biogeochem. Cycles* **29**, 691–707 (2015).
45. K. Seiter, C. Hensen, J. Schröter, M. Zabel, Organic carbon content in surface sediments—Defining regional provinces. *Deep Sea Res. Part I Oceanogr. Res. Pap.* **51**, 2001–2026 (2004).
46. E. A. Romankevich, A. A. Vetrov, V. I. Peresytkin, Organic matter of the World Ocean. *Russ. Geol. Geophys.* **50**, 299–307 (2009).

47. E. B. Burwicz, L. H. Rüpke, K. Wallmann, Estimation of the global amount of submarine gas hydrates formed via microbial methane formation based on numerical reaction-transport modeling and a novel parameterization of Holocene sedimentation. *Geochim. Cosmochim. Acta* **75**, 4562–4576 (2011).
48. J. J. Middelburg, K. Soetaert, P. M. J. Herman, Empirical relationships for use in global diagenetic models. *Deep Sea Res. Part I Oceanogr. Res. Pap.* **44**, 327–344 (1997).
49. T. Hantschel, A. I. Kauerauf, *Fundamentals of Basin and Petroleum Systems Modeling* (Springer-Verlag, 2009).
50. R. N. Glud, Oxygen dynamics of marine sediments. *Mar. Biol. Res.* **4**, 243–289 (2008).
51. R. N. Glud, J. K. Gundersen, O. Holby, Benthic in situ respiration in the upwelling area off central Chile. *Mar. Ecol. Prog. Ser.* **186**, 9–18 (1999).
52. M. Egger, N. Riedinger, J. M. Mogollón, B. B. Jørgensen, Global diffusive fluxes of methane in marine sediments. *Nat. Geosci.* **11**, 421–425 (2018).
53. D. Hülse, S. Arndt, S. Daines, P. Regnier, A. Ridgwell, OMEN-SED 1.0: A novel, numerically efficient organic matter sediment diagenesis module for coupling to Earth system models. *Geosci. Model Dev.* **11**, 2649–2689 (2018).
54. M. Thullner, A. W. Dale, P. Regnier, Global-scale quantification of mineralization pathways in marine sediments: A reaction-transport modeling approach. *Geochem. Geophys. Geosyst.* **10**, Q10012 (2009).
55. R. J. Parkes, G. Webster, B. A. Cragg, A. J. Weightman, C. J. Newberry, T. G. Ferdelman, J. Kallmeyer, B. B. Jørgensen, I. W. Aiello, J. C. Fry, Deep sub-seafloor prokaryotes stimulated at interfaces over geological time. *Nature* **436**, 390–394 (2005).
56. J. J. Middelburg, L. A. Levin, Coastal hypoxia and sediment biogeochemistry. *Biogeosciences* **6**, 1273–1293 (2009).

57. P. Van Cappellen, Y. Wang, Cycling of iron and manganese in surface sediments: A general theory for the coupled transport and reaction of carbon, oxygen, nitrogen, sulfur, iron, and manganese. *Am. J. Sci.* **296**, 197–243 (1996).
58. D. E. LaRowe, P. Van Cappellen, Degradation of natural organic matter: A thermodynamic analysis. *Geochim. Cosmochim. Acta* **75**, 2030–2042 (2011).
59. D. E. LaRowe, J. P. Amend, Catabolic rates, population sizes and doubling/replacement times of microorganisms in natural settings. *Am. J. Sci.* **315**, 167–203 (2015).
60. H. C. Helgeson, D. H. Kirkham, G. C. Flowers, Theoretical prediction of the thermodynamic behavior of aqueous electrolytes by high pressures and temperatures: IV. Calculation of activity coefficients, osmotic coefficients, and apparent molal and standard and relative partial molal properties to 600°C and 5 kb. *Am. J. Sci.* **281**, 1249–1516 (1981).
61. J. C. Tanger IV, H. C. Helgeson, Calculation of the thermodynamic and transport properties of aqueous species at high pressures and temperatures: Revised equations of state for the standard partial molal properties of ions and electrolytes. *Am. J. Sci.* **288**, 19–98 (1988).
62. E. L. Shock, E. H. Oelkers, J. W. Johnson, D. A. Sverjensky, H. C. Helgeson, Calculation of the thermodynamic properties of aqueous species at high pressures and temperatures. Effective electrostatic radii, dissociation constants and standard partial molal properties to 1000 °C and 5 kbar. *J. Chem. Soc. Faraday Trans.* **88**, 803–826 (1992).
63. J. W. Johnson, E. H. Oelkers, H. C. Helgeson, SUPCRT92: A software package for calculating the standard molal thermodynamic properties of minerals, gases, aqueous species, and reactions from 1 to 5000 bar and 0 to 1000°C. *Comput. Geosci.* **18**, 899–947 (1992).
64. E. L. Shock, H. C. Helgeson, Calculation of the thermodynamic and transport properties of aqueous species at high pressures and temperatures: Correlation algorithms for ionic species and equation of state predictions to 5 kb and 1000°C. *Geochim. Cosmochim. Acta* **52**, 2009–2036 (1988).

65. E. L. Shock, H. C. Helgeson, D. A. Sverjensky, Calculation of the thermodynamic and transport properties of aqueous species at high pressures and temperatures: Standard partial molal properties of inorganic neutral species. *Geochim. Cosmochim. Acta* **53**, 2157–2183 (1989).
66. E. L. Shock, H. C. Helgeson, Calculation of the thermodynamic and transport properties of aqueous species at high pressures and temperatures: Standard partial molal properties of organic species. *Geochim. Cosmochim. Acta* **54**, 915–945 (1990).
67. D. A. Sverjensky, E. L. Shock, H. C. Helgeson, Prediction of the thermodynamic properties of aqueous metal complexes to 1000°C and 5 kb. *Geochim. Cosmochim. Acta* **61**, 1359–1412 (1997).
68. M. D. Schulte, E. L. Shock, R. H. Wood, The temperature dependence of the standard-state thermodynamic properties of aqueous nonelectrolytes. *Geochim. Cosmochim. Acta* **65**, 3919–3930 (2001).
69. H. C. Helgeson, Thermodynamics of hydrothermal systems at elevated temperatures and pressures. *Am. J. Sci.* **267**, 729–804 (1969).
70. B. B. Jørgensen, R. J. Parkes, Role of sulfate reduction and methane production by organic carbon degradation in eutrophic fjord sediments (Limfjorden, Denmark). *Limnol. Oceanogr.* **55**, 1338–1352 (2010).
71. A. Vion, L. Menot, Continental margins between 140m and 3500m depth (2009).
72. A. D. Steen, A. Crits-Christoph, P. Carini, K. M. DeAngelis, N. Fierer, K. G. Lloyd, J. C. Thrash, High proportions of bacteria and archaea across most biomes remain uncultured. *ISME J.* **13**, 3126–3130 (2019).
73. L. A. Zinke, C. Glombitza, J. T. Bird, H. Røy, B. B. Jørgensen, K. G. Lloyd, J. P. Amend, B. K. Reese, Microbial organic matter degradation potential in Baltic Sea sediments influenced by depositional conditions and in situ geochemistry. *Appl. Environ. Microbiol.* **85**, e02164-18 (2019).
74. W. D. Orsi, T. A. Richards, W. R. Francis, Predicted microbial secretomes and their target substrates in marine sediment. *Nat. Microbiol.* **3**, 32–37 (2018).

75. B. J. Baker, C. S. Lazar, A. P. Teske, G. J. Dick, Genomic resolution of linkages in carbon, nitrogen, and sulfur cycling among widespread estuary sediment bacteria. *Microbiome* **3**, 14 (2015).
76. I. P. G. Marshall, S. M. Karst, P. H. Nielsen, B. B. Jørgensen, Metagenomes from deep Baltic Sea sediments reveal how past and present environmental conditions determine microbial community composition. *Mar. Genomics* **37**, 58–68 (2018).
77. L. A. Zinke, M. M. Mullis, J. T. Bird, I. P. G. Marshall, B. B. Jørgensen, K. G. Lloyd, J. P. Amend, B. K. Reese, Thriving or surviving? Evaluating active microbial guilds in Baltic Sea sediment. *Environ. Microbiol. Rep.* **9**, 528–536 (2017).
78. W. D. Orsi, Ecology and evolution of seafloor and subseafloor microbial communities. *Nat. Rev. Microbiol.* **16**, 671–683 (2018).
79. J. F. Biddle, J. S. Lipp, M. A. Lever, K. G. Lloyd, K. B. Sørensen, R. Anderson, H. F. Fredricks, M. Elvert, T. J. Kelly, D. P. Schrag, M. L. Sogin, J. E. Brenchley, A. Teske, C. H. House, K.-U. Hinrichs, Heterotrophic Archaea dominate sedimentary subsurface ecosystems off Peru. *Proc. Natl. Acad. Sci. U.S.A.* **103**, 3846–3851 (2006).
80. S. E. Ruff, J. F. Biddle, A. P. Teske, K. Knittel, A. Boetius, A. Ramette, Global dispersion and local diversification of the methane seep microbiome. *Proc. Natl. Acad. Sci. U.S.A.* **112**, 4015–4020 (2015).
81. B. K. Reese, L. A. Zinke, M. S. Sobol, D. E. LaRowe, B. N. Orcutt, X. Zhang, U. Jaekel, F. Wang, T. Dittmar, D. Defforey, B. Tully, A. Paytan, J. B. Sylvan, J. P. Amend, K. J. Edwards, P. Girguis, Nitrogen cycling of active bacteria within oligotrophic sediment of the mid-atlantic ridge flank. *Geomicrobiol. J.* **35**, 468–483 (2018).
82. B. J. Tully, J. F. Heidelberg, Potential mechanisms for microbial energy acquisition in oxic deep-sea sediments. *Appl. Environ. Microbiol.* **82**, 4232–4243 (2016).
83. A. Durbin, A. Teske, Microbial diversity and stratification of South Pacific abyssal marine sediments. *Environ. Microbiol.* **13**, 3219–3234 (2011).

84. J. Chun, A. Oren, A. Ventosa, H. Christensen, D. R. Arahal, M. S. da Costa, A. P. Rooney, H. Yi, X.-W. Xu, S. De Meyer, M. E. Trujillo, Proposed minimal standards for the use of genome data for the taxonomy of prokaryotes. *Int. J. Syst. Evol. Microbiol.* **68**, 461–466 (2018).
85. A. Tkacz, M. Hortal, P. S. Poole, Absolute quantitation of microbiota abundance in environmental samples. *Microbiome* **6**, 110 (2018).
86. C. L. Myers, D. R. Barrett, M. A. Hibbs, C. Huttenhower, O. G. Troyanskaya, Finding function: Evaluation methods for functional genomic data. *BMC Genomics* **7**, 187 (2006).
87. J. M. Janda, S. L. Abbott, 16S rRNA gene sequencing for bacterial identification in the diagnostic laboratory: Pluses, perils, and pitfalls. *J. Clin. Microbiol.* **45**, 2761–2764 (2007).
88. K. H. Nealson, Sediment bacteria: Who's there, what are they doing, and what's new? *Annu. Rev. Earth Planet. Sci.* **25**, 403–434 (1997).
89. C. Arnosti, C. Bell, D. L. Moorhead, R. L. Sinsabaugh, A. D. Steen, M. Stromberger, M. Wallenstein, M. N. Weintraub, Extracellular enzymes in terrestrial, freshwater, and marine environments: Perspectives on system variability and common research needs. *Biogeochemistry* **117**, 5–21 (2014).
90. K. G. Lloyd, A. D. Steen, J. Ladau, J. Yin, L. Crosby, Phylogenetically novel uncultured microbial cells dominate Earth microbiomes. *mSystems* **3**, e00055-18 (2018).
91. D. J. Burdige, K. G. Gardner, Molecular weight distribution of dissolved organic carbon in marine sediment pore waters. *Mar. Chem.* **62**, 45–64 (1998).
92. C. A. Fox, H. A. Abdulla, D. J. Burdige, J. P. Lewicki, T. Komada, Composition of dissolved organic matter in pore waters of anoxic marine sediments analyzed by <sup>1</sup>H nuclear magnetic resonance spectroscopy. *Front. Mar. Sci.* **5**, 172 (2018).
93. D. E. LaRowe, E. Burwicz, S. Arndt, A. W. Dale, J. P. Amend, Temperature and volume of global marine sediments. *Geology* **45**, 275–278 (2017).

94. J. M. Mogollón, A. W. Dale, H. Fossing, P. Regnier, Timescales for the development of methanogenesis and free gas layers in recently-deposited sediments of Arkona Basin (Baltic Sea). *Biogeosciences* **9**, 1915–1933 (2012).
95. K. Wallmann, G. Aloisi, M. Haeckel, A. Obzhairov, G. Pavlova, P. Tishchenko, Kinetics of organic matter degradation, microbial methane generation, and gas hydrate formation in anoxic marine sediments. *Geochim. Cosmochim. Acta* **70**, 3905–3927 (2006).
96. J. J. Middelburg, A simple rate model for organic matter decomposition in marine sediments. *Geochim. Cosmochim. Acta* **53**, 1577–1581 (1989).
97. J. T. Westrich, R. A. Berner, The role of sedimentary organic-matter in bacterial sulfate reduction: The G Model Tested. *Limnol. Oceanogr.* **29**, 236–249 (1984).
98. M. Marquardt, C. Hensen, E. Piñero, K. Wallmann, M. Haeckel, A transfer function for the prediction of gas hydrate inventories in marine sediments. *Biogeosciences* **7**, 2925–2941 (2010).
99. R. N. Glud, J. K. Gundersen, B. B. Jørgensen, N. P. Revsbech, H. D. Schulz, Diffusive and total oxygen uptake of deep-sea sediments in the eastern South Atlantic Ocean: In situ and laboratory measurements. *Deep Sea Res. Part I Oceanogr. Res. Pap.* **41**, 1767–1788 (1994).
100. R. N. Glud, J. K. Gundersen, H. Røy, B. B. Jørgensen, Seasonal dynamics of benthic O<sub>2</sub> uptake in a semienclosed bay: Importance of diffusion and faunal activity. *Limnol. Oceanogr.* **48**, 1265–1276 (2003).
101. R. N. Glud, O. Holby, F. Hoffmann, D. Canfield, Benthic mineralization and exchange in Arctic sediments (Svalbard, Norway). *Mar. Ecol. Prog. Ser.* **173**, 237–251 (1998).
102. F. Wenzhöfer, O. Holby, O. Kohls, Deep penetrating benthic oxygen profiles measured in situ by oxygen optodes. *Deep Sea Res. Part I Oceanogr. Res. Pap.* **48**, 1741–1755 (2001).
103. F. Wenzhöfer, M. Adler, O. Kohls, C. Hensen, B. Strotmann, S. Boehme, H. D. Schulz, Calcite dissolution driven by benthic mineralization in the deep-sea: In situ measurements of Ca<sup>2+</sup>, pH, pCO<sub>2</sub> and O<sub>2</sub>. *Geochim. Cosmochim. Acta* **65**, 2677–2690 (2001).

104. R. A. Jahnke, S. R. Emerson, C. E. Reimers, J. Schuffert, K. Ruttner, D. Archer, Benthic recycling of biogenic debris in the eastern tropical Atlantic Ocean. *Geochim. Cosmochim. Acta* **53**, 2947–2960 (1989).
105. F. Wenzhöfer, R. N. Glud, Benthic carbon mineralization in the Atlantic: A synthesis based on in situ data from the last decade. *Deep Sea Res. Part I Oceanogr. Res. Pap.* **49**, 1255–1279 (2002).
106. U. Witte, N. Aberle, M. Sand, F. Wenzhöfer, Rapid response of a deep-sea benthic community to POM enrichment: An in situ experimental study. *Mar. Ecol. Prog. Ser.* **251**, 27–36 (2003).
107. U. Witte, F. Wenzhöfer, S. Sommer, A. Boetius, P. Heinz, N. Aberle, M. Sand, A. Cremer, W.-R. Abraham, B. B. Jørgensen, O. Pfannkuche, In situ experimental evidence of the fate of a phytodetritus pulse at the abyssal sea floor. *Nature* **424**, 763–766 (2003).
108. K. S. Black, G. R. Fones, O. C. Peppe, H. A. Kennedy, I. Bentaleb, An autonomous benthic lander:: Preliminary observations from the UK BENBO thematic programme. *Cont. Shelf Res.* **21**, 859–877 (2001).
109. R. N. Glud, H. Stahl, P. Berg, F. Wenzhöfer, K. Oguri, H. Kitazato, In situ microscale variation in distribution and consumption of 2: A case study from a deep ocean margin sediment (Sagami Bay, Japan). *Limnol. Oceanogr.* **54**, 1–12 (2009).
110. P. Giordani, W. Helder, E. Koning, S. Miserocchi, R. Danovaro, A. Malaguti, Gradients of benthic–pelagic coupling and carbon budgets in the Adriatic and Northern Ionian Sea. *J. Mar. Syst.* **33–34**, 365–387 (2002).
111. B. Lansard, C. Rabouille, L. Denis, C. Grenz, In situ oxygen uptake rates by coastal sediments under the influence of the Rhône River (NW Mediterranean Sea). *Cont. Shelf Res.* **28**, 1501–1510 (2008).
112. B. Lansard, C. Rabouille, L. Denis, C. Grenz, Benthic remineralization at the land–ocean interface: A case study of the Rhône River (NW Mediterranean Sea). *Estuar. Coast. Shelf Sci.* **81**, 544–554 (2009).



113. O. Sachs, E. J. Sauter, M. Schlüter, M. M. R. van der Loeff, K. Jerosch, O. Holby, Benthic organic carbon flux and oxygen penetration reflect different plankton provinces in the Southern Ocean. *Deep Sea Res. Part I Oceanogr. Res. Pap.* **56**, 1319–1335 (2009).
114. D. E. Canfield, B. B. Jørgensen, H. Fossing, R. Glud, J. Gundersen, N. B. Ramsing, B. Thamdrup, J. W. Hansen, L. P. Nielsen, P. O. J. Hall, Pathways of organic carbon oxidation in three continental margin sediments. *Mar. Geol.* **113**, 27–40 (1993).
